# Supplementary material
Source: publisher figshare collection journal article supplement (https://frontiersin.figshare.com/ndownloader/files/21529242)
Supplement: Supplementary file [file 21529242]

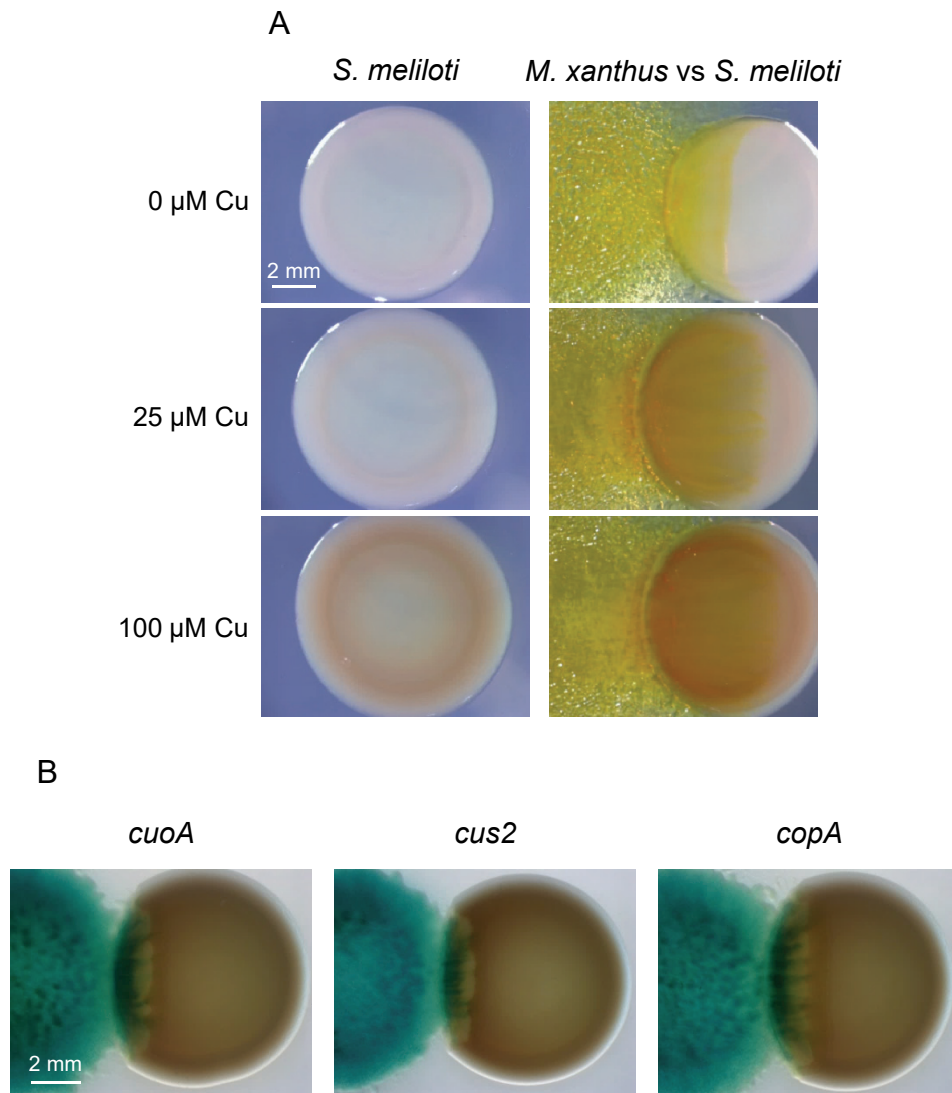

Figure S1. Predatory activity of *M. xanthus* versus *S. meliloti* GR4. **(A)** The wild-type strain of *M. xanthus* was co-cultured with *S. meliloti* GR4 in the presence of various copper concentrations and in the absence of this metal. Pictures were taken at 72 h of incubation under a dissecting microscope with illumination from the top of the colonies. **(B)** *M. xanthus* strains harboring fusions between promoters of genes *cuoA*, *cus2* and *copA*, and *lacZ* were co-cultured with *S. meliloti* GR4. Cells were spotted onto CTT agar plates containing 300  $\mu$ M copper and 100  $\mu$ g/ml X-gal to visualize the blue color development when the promoters are activated by the metal. Pictures were taken after 48 h of incubation under a dissecting microscope with illumination from the bottom of the colonies.
